# Effects of *NR1H3* Genetic Variation on the Expression of Liver X Receptor $\alpha$ and the Progression of Alzheimer's Disease

Teemu Natunen<sup>1</sup>, Henna Martiskainen<sup>1</sup>, Timo Sarajärvi<sup>1</sup>, Seppo Helisalmi<sup>1</sup>, Juha-Pekka Pursiheimo<sup>2</sup>, Jayashree Viswanathan<sup>1</sup>, Marjo Laitinen<sup>1</sup>, Petra Mäkinen<sup>1</sup>, Tarja Kauppinen<sup>1</sup>, Tuomas Rauramaa<sup>3</sup>, Ville Leinonen<sup>4</sup>, Irina Alafuzoff<sup>5</sup>, Annakaisa Haapasalo<sup>1</sup>, Hilikka Soininen<sup>1</sup>, Mikko Hiltunen<sup>1\*</sup>

**1** Institute of Clinical Medicine – Neurology, University of Eastern Finland and Department of Neurology, Kuopio University Hospital, Kuopio, Finland, **2** Turku Centre for Biotechnology, University of Turku, Turku, Finland, **3** Department of Pathology, Kuopio University Hospital, Finland and Institute of Clinical Medicine, Unit of Pathology, University of Eastern Finland, Kuopio, Finland, **4** Institute of Clinical Medicine – Neurosurgery, University of Eastern Finland and Neurosurgery of NeuroCenter, Kuopio University Hospital, Kuopio, Finland, **5** Department of Immunology, Genetics and Pathology, Uppsala University, Uppsala, Sweden

## Abstract

Alzheimer's disease (AD) has been postulated to involve defects in the clearance of amyloid- $\beta$  (A $\beta$ ). Activation of liver X receptor  $\alpha$  (LXR $\alpha$ ) increases the expression of apolipoprotein E (ApoE) as well as cholesterol transporters *ABCA1* and *ABCG1*, leading to augmented clearance of A $\beta$ . We have previously shown that the C allele of rs7120118 in the *NR1H3* gene encoding LXR $\alpha$  reduces the risk of AD. Here, we wanted to assess whether the rs7120118 variation affects the progression of AD and modulates the expression of *NR1H3* and its downstream targets *APOE*, *ABCA1* and *ABCG1*. We utilized tissue samples from the inferior temporal cortex of 87 subjects, which were subdivided according to Braak staging into mild, moderate and severe AD groups on the basis of AD-related neurofibrillary pathology. *APOE*  $\epsilon$ 4 allele increased soluble A $\beta$ 42 levels in the tissue samples in a dose-dependent manner, but did not affect the expression status of *APOE*. In contrast, the CC genotype of rs7120118 was underrepresented in the severe group, although this result did not reach statistical significance. Also, patients with the CC genotype of rs7120118 showed significantly decreased soluble A $\beta$ 42 levels as compared to the patients with TT genotype. Although the severity of AD did not affect *NR1H3* expression, the mRNA levels of *NR1H3* among the patients with CT genotype of rs7120118 were significantly increased as compared to the patients with TT genotype. These results suggest that genetic variation in *NR1H3* modulates the expression of LXR $\alpha$  and the levels of soluble A $\beta$ 42.

**Citation:** Natunen T, Martiskainen H, Sarajärvi T, Helisalmi S, Pursiheimo J-P, et al. (2013) Effects of *NR1H3* Genetic Variation on the Expression of Liver X Receptor  $\alpha$  and the Progression of Alzheimer's Disease. PLoS ONE 8(11): e80700. doi:10.1371/journal.pone.0080700

**Editor:** Bart Dermaut, Pasteur Institute of Lille, France

**Received:** September 9, 2013; **Accepted:** October 16, 2013; **Published:** November 20, 2013

**Copyright:** © 2013 Natunen et al. This is an open-access article distributed under the terms of the Creative Commons Attribution License, which permits unrestricted use, distribution, and reproduction in any medium, provided the original author and source are credited.

**Funding:** This study was funded by the Academy of Finland, EVO grant 5772708 of Kuopio University Hospital, Sigrid Juselius Foundation, the Strategic Funding of the University of Eastern Finland (UEF-Brain), and BIOMARKAPD project in the JPND programme. The funders had no role in study design, data collection and analysis, decision to publish, or preparation of the manuscript.

**Competing Interests:** The authors have declared that no competing interests exist.

\* E-mail: mikko.hiltunen@uef.fi

## Introduction

Alzheimer's disease (AD), the most common cause of dementia in elderly, is a progressive neurodegenerative disease leading to severe memory impairment and finally to death. The major neuropathological hallmarks are the extracellular amyloid plaques and intracellular neurofibrillary tangles (NFTs) [1]. Aggregation of amyloid- $\beta$  (A $\beta$ ) peptide to A $\beta$  oligomers and finally to amyloid plaques has been postulated to trigger downstream events in AD, such as hyperphosphorylation of tau leading to the formation of NFTs, synaptic dysfunction, and loss of neurons in specific brain areas. A $\beta$  is processed from amyloid precursor protein (APP) after sequential cleavage by  $\beta$ - and  $\gamma$ -secretases [2]. It has been suggested that the elevation of A $\beta$  levels in the sporadic AD is due to decreased clearance rather than increased production of A $\beta$  [3]. Interestingly, the pathogenesis of the familial form of AD was recently shown to involve not only increased A $\beta$  production but also slower A $\beta$  clearance rate from the cerebrospinal fluid (CSF), implying that similar mechanisms may in fact underlie both forms

of the disease [4]. Several enzymes and pathways are involved in A $\beta$  degradation and clearance [5]. Furthermore, the strongest genetic risk factor in sporadic AD, allelic variation in *APOE* gene has been linked to the clearance of A $\beta$  [6]. Apolipoprotein E (ApoE) is the major apolipoprotein in the central nervous system (CNS) and it is produced mainly by astrocytes but also by microglia [7]. ApoE mediates the lipid transport between different tissue and cell types [8]. There are three different isoforms of ApoE, ApoE2, -3 and 4, and these are encoded by *APOE* alleles  $\epsilon$ 2,  $\epsilon$ 3 and  $\epsilon$ 4, respectively. *APOE*  $\epsilon$ 4 allele increases the risk of AD and decreases the age of onset as compared to the most common allele  $\epsilon$ 3. In contrast,  $\epsilon$ 2 decreases the risk and delays the age of onset [9]. A recent study using CSF biomarkers and PiB PET imaging showed that A $\beta$  accumulation in the human brain corresponded to the *APOE* genotype in an isoform-dependent manner ( $\epsilon$ 4 >  $\epsilon$ 3 >  $\epsilon$ 2) [10]. Furthermore, the same study showed that ApoE4 is less efficient in A $\beta$  clearance than ApoE3 in a mouse model expressing human ApoE isoforms [10].

Liver X receptor  $\alpha$  (LXR $\alpha$ ) is a ligand-activated transcription factor, which controls the expression of *APOE*, ATP-binding cassette transporter A1 (*ABCA1*) and G1 (*ABCG1*) and other genes involved lipid homeostasis [11]. LXR $\alpha$  is expressed particularly in the liver, but also in the brain. LXR $\alpha$  forms a heterodimer with retinoid X receptor (RXR) and agonists of both LXR $\alpha$  and RXR have been shown to increase ApoE-dependent A $\beta$  clearance in AD mouse models [6,12]. Cholesterol transporters, like ABCA1, increase lipidation of ApoE and this is crucial for the A $\beta$  clearance induced by an LXR $\alpha$  agonist [13]. Recently, the RXR agonist bexarotene was shown to reduce soluble A $\beta$  levels and amyloid plaque burden as well as to reverse the cognitive deficits in two different AD mouse models after short- and long-term administration of the drug [12]. In spite of the fact that other studies have partially failed to replicate these results [14–17], these data emphasize the central role of LXR $\alpha$  and RXR in the regulation of A $\beta$  accumulation in AD pathogenesis.

We have previously studied the genetic alterations in the *NR1H3* gene encoding LXR $\alpha$  in Finnish AD case-control cohort [18]. We found that the single nucleotide polymorphism rs7120118, located in the intron between exons 6 and 7, showed a protective effect for the C allele carriers (OR = 0.70, 95% CI 0.53–0.93). Moreover, the total-tau and the phospho-tau levels in the CSF were decreased in AD patients carrying the C allele of rs7120118 [18]. Prompted by these results, we wanted to investigate the effects of rs7120118 polymorphism in *NR1H3* gene in a clinically and neuropathologically well-characterized brain sample set consisting of 87 subjects with different degree AD pathology. Since LXR $\alpha$  is considered as a potential drug target in AD [6,12], it is important to investigate whether genetic alteration in *NR1H3* affects the expression of LXR $\alpha$  or its downstream targets. Here, we have determined the effects of the rs7120118 polymorphism on the expression of *NR1H3*, *APOE*, *ABCA1*, and *ABCG1* as well as the levels of soluble A $\beta$ 42 and  $\beta$ -secretase activity in the inferior temporal cortex of AD patients at different stages of the disease.

## Materials and Methods

### Neuropathological sample cohort

Human post-mortem brain samples were obtained from Kuopio University Hospital. This set included inferior temporal lobe samples from 87 older individuals investigated within memory clinic research projects and later autopsied and evaluated for AD pathology (21 males and 66 females; mean age  $81 \pm$  SD 8.6 years) (Table 1). The set was subdivided in three severity groups; mild ( $n = 46$ ), moderate ( $n = 14$ ) and severe ( $n = 27$ ) according to Braak staging (0–2 = mild, 3–4 = moderate, 5–6 = severe) [19]. The subjects with Braak stage 0 are included to the mild group. Written informed consent from the next of kin was obtained to use brain samples for research purposes. The Ethics Committee of the Kuopio University Hospital and University of Eastern Finland has approved the study.

### CSF analysis of A $\beta$ 42, phosphorylated tau and total tau

The CSF levels of A $\beta$ 42 ( $n = 28$ ), total tau (tot-tau,  $n = 27$ ) and phosphorylated tau (p-tau, phosphorylated at Thr181,  $n = 27$ ) of the AD patients were measured by using commercially available enzyme-linked immunosorbent assays (INNOTEST<sup>®</sup>  $\beta$ -AMYLOID<sub>(1–42)</sub>, tot-tau, INNOTEST hTAU Ag, p-tau, INNOTEST PHOSPHO-TAU<sub>(181P)</sub>, Innogenetics, Ghent, Belgium).

### DNA extraction from the frozen brain tissue samples

Frozen brain tissue samples were dissected from the inferior temporal lobe and homogenized to TRI-reagent (10 ml TRI-reagent/1 g brain tissue). DNA was isolated from 1 ml of Trizol homogenate. For the initial tissue homogenization, 0.5 ml of Back extraction buffer (4 M guanidine thiocyanate; 50 mM sodium citrate; 1 M Tris, pH 8.0) was used per 1.0 ml of TRI-reagent used. Back extraction buffer was added directly to the organic phase and samples were mixed by inversion for 15 sec and incubated for 10 min at the room temperature. Phase separation was performed by centrifugation at  $12000 \times g$  for 15 min at  $+4^\circ\text{C}$ . The upper aqueous phase containing DNA was transferred to a clean tube and the interphase and organic phases were saved at  $+4^\circ\text{C}$  for subsequent protein extraction. DNA from the aqueous phase was precipitated by adding 0.5 ml of isopropanol per 1.0 ml of TRI Reagent used for the initial homogenization (1:1). Samples were mixed by inversion and incubated for 30 min at  $-20^\circ\text{C}$ . DNA was collected by centrifugation at  $12000 \times g$  for 25 min at  $+4^\circ\text{C}$  and the supernatant was removed. DNA pellets were washed twice with 1.0 ml of 75% ethanol and air-dried for 5 min. DNA samples were dissolved in 50  $\mu\text{l}$  of Tris-EDTA buffer (10 mM Tris; 0.1 mM EDTA, pH 8.0).

### Genotyping of DNA samples

DNA samples extracted from the post-mortem brain tissue samples were genotyped for SNP rs7180118 in *NR1H3* gene using cycle sequencing. PCR was conducted around the rs7180118 site by using the following primers: 5'-GCTCTCCCTCCTTCA-GAAT-3' and 5'-CACGGAATGAACACCTCAAA-3'. After purification, the PCR products were subsequently sequenced using BigDye<sup>™</sup> Terminator sequencing kit (Applied Biosystems) and ABI PRISM<sup>®</sup> 3100 Genetic Analyzer (Applied Biosystems).

### Extraction and analysis of RNA from the frozen brain tissue samples

The first set including 24 brain samples was homogenized in TRI-reagent. Samples were treated twice with TissueLyser (Qiagen) for 2 min at  $+4^\circ\text{C}$ . Chloroform was added (one fifth of the volume of TRI-reagent) and the tubes were shaken vigorously. Mixtures were kept at room temperature for 5 min and the phase separation was performed by centrifugation at  $12000 \times g$  for 20 min at  $+4^\circ\text{C}$ . The aqueous phase was transferred to clean tubes and RNA was precipitated with 2-propanol by mixing and incubating at room temperature for 30 min. Samples were centrifuged at  $12000 \times g$  for 25 min at  $+4^\circ\text{C}$  and the pellets were washed twice with 75% ethanol. RNA pellets were air-dried and dissolved in RNase-free H<sub>2</sub>O. RNA from the second set including 63 brain samples was extracted using Qiagen RNeasy Lipid Tissue Mini Kit (Qiagen). The quality of RNA samples was elucidated by determining the RNA integrity number (RIN) values using 2100 Bioanalyzer (Agilent). Subsequently, RNA samples were categorized into three subgroups according the RIN values;  $<4$ ,  $<6$  or  $<8$ . The distribution of RNA samples based on the RIN values among the whole sample set was 41.0% (RIN $<4$ ), 28.2% (RIN $<6$ ) and 30.8% (RIN $<8$ ). The distribution of RIN values in the TRI-reagent extracted samples was 13.0% (RIN $<4$ ), 47.8% (RIN $<6$ ) and 39.2% (RIN $<8$ ), while it was 50.0% (RIN $<4$ ), 24.1% (RIN $<6$ ) and 25.9% (RIN $<8$ ) in the RNeasy Lipid Tissue Mini Kit extracted samples. The post-mortem delay did not show correlation with the RIN values (Pearson's correlation,  $r = -0.09$ ,  $p = 0.40$ ). Equal amounts of total RNA samples were subjected to cDNA synthesis using Dynamo qPCR kit (Finnzymes). Subsequently, KAPA PROBE FAST qPCR kit using PCR primers and

**Table 1.** Demographics and pathology of the cases.

| Severity <sup>a</sup> |        | Braak stage | Number of cases/<br>stage | Gender: males/<br>females | Age at death, mean<br>(years) | PMD <sup>b</sup> , mean<br>(hours) | Brain weight,<br>mean (g) |
|-----------------------|--------|-------------|---------------------------|---------------------------|-------------------------------|------------------------------------|---------------------------|
| MILD                  | n = 46 | 0           | 8                         | 17/29                     | 80.7                          | 17.7                               | 1215                      |
|                       |        | 1           | 17                        |                           |                               |                                    |                           |
|                       |        | 2           | 21                        |                           |                               |                                    |                           |
| MODERATE              | n = 14 | 3           | 7                         | 2/12                      | 83.5                          | 15.9                               | 1100                      |
|                       |        |             | 4                         |                           |                               |                                    |                           |
| SEVERE                | n = 27 | 5           | 16                        | 2/25                      | 81.6                          | 6.5                                | 1030                      |
|                       |        |             | 6                         |                           |                               |                                    |                           |

<sup>a</sup>Classification to mild, moderate and severe groups according to Braak staging; 0–2 = mild, 3–4 = moderate, 5–6 = severe.

<sup>b</sup>Post-mortem delay.

doi:10.1371/journal.pone.0080700.t001

probes that were designed using Roche Universal Probe Library ([www.roche-applied-science.com/sis/rtPCR/upl/ezhome.html](http://www.roche-applied-science.com/sis/rtPCR/upl/ezhome.html)) were used for the amplification of cDNA samples by real-time quantitative PCR (7900HT, Applied Biosystems). The primers and probes were the following: For *NR1H3* GTTATAACCGGGAAGACTTTGC and AAACCTCGGCATCATGAGTTG, and probe: 80; for *ABCA1* GGCCTACCAAGGGAGAAACT and TGTCATCACATGTACATCCA, and probe:84; for *ABCG1* TCAGGGACCTTTCCTATTTCG and TTCCTTT-CAGGAGGGTCTTGT, and probe:22; for *ApoE* GGACGAGGTAAGGAGCA and CTGCAGGCGTATCTGCTG, and probe: 64; for *GAPDH* GCATCCTGGGCTACACTGA and CCAGCGTCAAAGGTGGAG, and probe:82; and for  $\beta$ -Actin CCAACCGCGAGAAGATGA and CCAGAGGCGTACAGG-GATAG, and probe:11. Comparative  $\Delta\Delta C_t$  method was used to analyze the *GAPDH*-normalized *NR1H3*, *ABCA1*, *ABCG1* and *APOE* mRNA levels.

### $\beta$ -secretase activity assay

Tissue samples from the temporal cortex were dissected from the post-mortem brain of AD patients. Frozen samples were mechanically homogenized in an ice bath in 400  $\mu$ l of buffer B (20 mM Hepes pH 7.5, 150 mM KCl, 2 mM EGTA) containing 1:100 EDTA-free protease inhibitor cocktail (Thermo Scientific) and Halt<sup>TM</sup> phosphatase inhibitor cocktail (Thermo Scientific). After one-hour centrifugation in 100000 $\times g$  (50.4 Ti rotor; Beckman) at +4°C, the supernatant (= soluble fraction) was collected and stored at -70°C for soluble A $\beta$  x-42 measurements. The remaining pellet was washed with buffer B followed by centrifugation at 100000 $\times g$  (30 min, +4°C). The supernatant was discarded and the pellet was solubilized in buffer B containing 1% CHAPSO (3-[(3-Cholamidopropyl)dimethylammonio]-2-hydroxy-1-propanesulfonate; Cat #220202, Calbiochem) by rotation at +4°C for 1 hour and centrifuged at 100000 $\times g$  (1 hour) to collect the supernatant (= membrane fraction) for the  $\beta$ -secretase activity assay.  $\beta$ -Secretase Activity Assay Kit (Cat #K360-100, BioVision, CA, USA) was used to measure  $\beta$ -secretase activity from the membrane fraction according to the manufacturer's instructions. Briefly, equal amounts (1  $\mu$ g) of membrane protein fractions were incubated at +37°C for 1 hour with the  $\beta$ -secretase-specific fluorogenic substrate peptide conjugated to fluorescent reporter molecules EDANS and DABCYL. The  $\beta$ -secretase inhibitor provided in the assay kit was mixed with recombinant  $\beta$ -secretase and incubated for 1 hour. At the same time, another  $\beta$ -secretase inhibitor, GL189 (H-VENstatineVAEF-NH<sub>2</sub>; Product #565780-500MG, Calbiochem) was used to validate the specificity of the

$\beta$ -secretase activity assay. GL189 was added (end concentration 150  $\mu$ M) to five additional, randomly selected AD brain membrane fraction samples and incubated for 1 hour. Subsequently, the emitted light (510 nm) was detected on a fluorescence microplate reader (Wallac) after EDANS excitation at 355 nm. Readings obtained from the substrate (without secretase) were subtracted from the readings of the samples before calculating the fold change in  $\beta$ -secretase activity. Both inhibitors decreased the  $\beta$ -secretase activity on average by 60%.

### Soluble A $\beta$ 42 measurements from the frozen tissue samples

A $\beta$  x-42 levels were measured from the soluble fraction of homogenized inferior temporal lobe tissue samples (see sample preparation for the  $\beta$ -secretase activity assay) using Human/Rat  $\beta$  Amyloid 42 (High-Sensitive; 292-64501) ELISA Kit (Wako). After 30-minute incubation at the room temperature, the reaction was terminated and the absorbance was measured at 450 nm using an ELISA microplate reader (BioRad). Protein concentrations of the soluble fractions were measured using BCA protein assay (Pierce), and the A $\beta$  concentrations were normalized to these total protein concentrations in each sample.

### Statistical analysis

All the statistical analyses were performed using SPSS/Win (version 17.0). One-way analysis of variance (ANOVA), followed by Fisher's least significant difference (LSD) post-hoc test was used in experiments with more than one variable. Haploview 4.2 program was used to determine the D'- and r<sup>2</sup>-values of SNP pairs (CEU population) within the single haplotype block at the 3'-end of *NR1H3* gene. The target gene option in the miRWalk database was used to assess the predicted miRNA binding sites in the *NR1H3* gene (<http://www.unm.uni-heidelberg.de/apps/zmf/mirwalk/predictedmirnagene.html>). Correlations were assessed using Pearson's two-tailed correlation analysis. All values are reported as means  $\pm$  standard deviation (SD). The level of statistical significance was defined as p<0.05.

### Results

#### Biochemical characterization of the temporal cortex tissue samples reveals augmented $\beta$ -secretase activity and increased soluble A $\beta$ 42 levels with respect to disease severity

Before determining the genetic effects of *APOE* and *NR1H3* gene variations in the brain, we first performed biochemical

assessment of the brain sample set consisting of inferior temporal cortex samples from 87 subjects with neuropathologically well-defined AD neurofibrillary changes (Table 1). For the subsequent analyses, the sample set was subdivided according to Braak staging into three severity groups: mild (stages = 0–2), moderate (stages = 3 and 4), and severe AD (stages = 5 and 6) [19]. Soluble A $\beta$ 42 levels in the inferior temporal cortex samples in the severe group of AD patients were significantly increased as compared to mild ( $p = 0.00002$ ) and moderate groups ( $p = 0.04$ ) (Figure 1A). Moreover,  $\beta$ -secretase activity was significantly increased in both severe ( $p = 0.0002$ ) and moderate ( $p = 0.02$ ) groups as compared to the mild group (Figure 1B). Additionally, a significant positive correlation between soluble A $\beta$ 42 levels and  $\beta$ -secretase activity was detected ( $r = 0.30$ ,  $p = 0.005$ ) (Figure 1C). A $\beta$ 42, total-tau (tot-tau) and phospho-tau (p-tau) levels in the CSF were available for the subset of subjects. As expected, A $\beta$ 42 levels in the CSF were decreased in both moderate ( $p = 0.03$ ) and severe ( $p = 0.006$ ) groups as compared to the mild group (Figure 2A). A significant negative correlation between CSF A $\beta$ 42 levels and soluble A $\beta$ 42 levels in temporal cortex samples was observed ( $r = -0.51$ ,  $p = 0.008$ ) (Figure 2B). Furthermore, tot-tau levels in the CSF were increased in the severe group as compared to both moderate ( $p = 0.04$ ) and mild groups ( $p = 0.0003$ ) (Figure 2C). Also, p-tau levels in the CSF were significantly increased in the severe group ( $p = 0.01$ ) as compared to the mild group (Figure 2D). Overall, these biochemical measurements in relation to the neurofibrillary changes indicating disease progression and severity reinforce the validity of this brain sample cohort for determining the effects of *APOE* and *NR1H3* gene variations on AD-related molecular events at different stages of AD.

#### *APOE* $\epsilon$ 4 allele increases the soluble A $\beta$ 42 levels in a dose-dependent manner in the AD brain tissue, but does not affect the expression status of *APOE*

The frequency of *APOE*  $\epsilon$ 2/3/4 alleles in the AD brain sample set was 0.03/0.64/0.33, respectively, which is in line with our previous study [18]. The *APOE*  $\epsilon$ 4 allele carriers were overrepresented in moderate and severe groups as compared to the mild group ( $p = 0.00003$ ) (Figure 3A). *APOE*  $\epsilon$ 4 allele increased soluble A $\beta$ 42 levels in a dose-dependent manner. This was indicated by the finding that the soluble A $\beta$ 42 levels were significantly increased in the AD patients with both *APOE*  $\epsilon$ 34 ( $p = 0.01$ ) and  $\epsilon$ 44 genotypes ( $p = 0.00007$ ) as compared to the  $\epsilon$ 33 genotype (Figure 3B). *APOE*  $\epsilon$ 4 allele also increased  $\beta$ -secretase activity in a dose-dependent manner, but this increase was not statistically significant (Figure 3C). qPCR analysis of *APOE* mRNA levels showed no significant changes with respect to the number of *APOE*  $\epsilon$ 4 alleles (Figure 3D). Altogether, these findings indicate that the *APOE*  $\epsilon$ 4 allele increases the soluble A $\beta$ 42 levels in the brain tissue in a dose-dependent manner, but does not affect the expression status of *APOE*.

#### The CC genotype of rs7120118 in *NR1H3* gene associates with decreased soluble A $\beta$ 42 levels

Next, we studied the effects of rs7120118 variation in the *NR1H3* gene on the progression of AD. The frequency of rs7120118 T/C alleles and TT/CT/CC genotypes was 0.59/0.41 and 0.38/0.42/0.20, respectively. This is in line with our previous data obtained from the Finnish AD patients in a clinic-based case-control cohort [18]. CC genotype was underrepresented in the severe group (Figure 4A), although this result did not reach statistical significance. Furthermore, soluble A $\beta$ 42 levels were significantly decreased among the patients with the CC

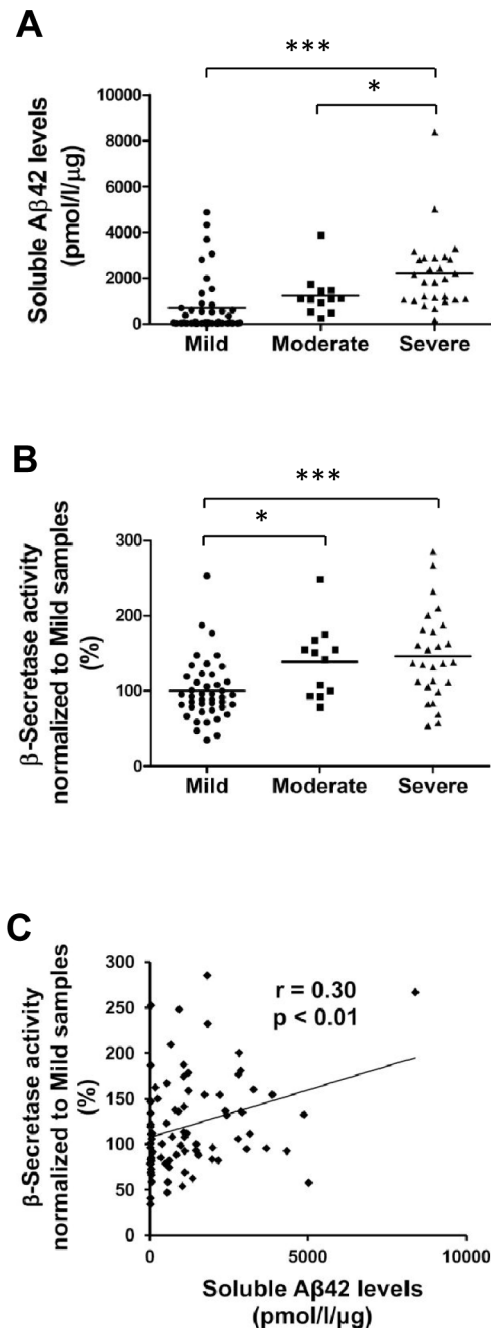

**Figure 1. Soluble A $\beta$ 42 levels and  $\beta$ -secretase activity increase with respect to disease severity in the temporal cortex of AD brain.** (A) A $\beta$ 42-ELISA measurements reveal a significant increase in the soluble A $\beta$ 42 levels in the severe group of temporal cortex samples as compared to the mild and moderate groups (\*\*\*) $p < 0.001$ , \* $p < 0.05$ , ANOVA, LSD, mild  $n = 43$ ; moderate  $n = 12$ ; severe  $n = 27$ ). (B)  $\beta$ -secretase activity assay indicates a significant increase in  $\beta$ -secretase activity in both moderate and severe groups as compared to the mild group of temporal cortex samples (\*\*\*) $p < 0.001$ , \* $p < 0.05$ , ANOVA, LSD, mild  $n = 43$ ; moderate  $n = 12$ ; severe  $n = 27$ ). (C) Soluble A $\beta$ 42 levels and  $\beta$ -secretase activity in the temporal cortex samples show significant correlation ( $p < 0.01$ , Pearson two-tailed correlation,  $n = 85$ ). doi:10.1371/journal.pone.0080700.g001

genotype of rs7120118 ( $p = 0.03$ ) as compared to the TT genotype (Figure 4B). However,  $\beta$ -secretase activity was not altered with respect to the rs7120118 genotypes (Figure 4C). Also, analysis of

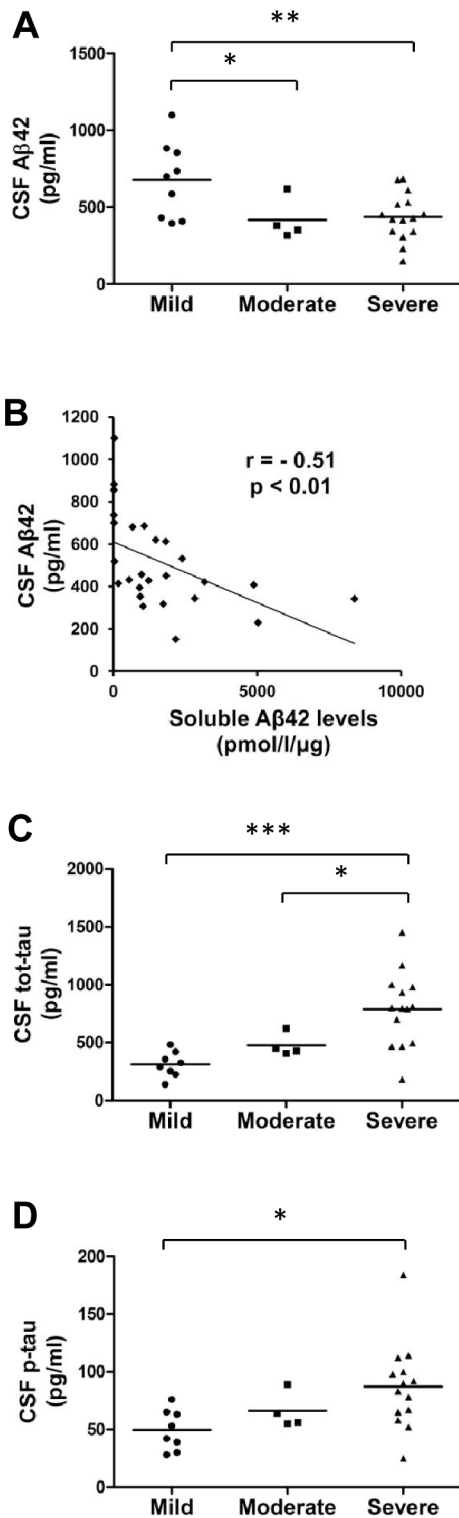

**Figure 2. A $\beta$ 42 levels in the CSF decrease while tot-tau and p-tau levels increase with respect to disease progression in AD temporal cortex.** (A) CSF A $\beta$ 42 levels are significantly decreased in both moderate and severe groups as compared to the mild group (\*\* $p < 0.01$ , \* $p < 0.05$ , ANOVA, LSD, mild  $n = 9$ ; moderate  $n = 4$ ; severe  $n = 15$ ). (B) CSF A $\beta$ 42 levels and soluble A $\beta$ 42 levels indicate a significant negative correlation in the temporal cortex samples ( $p < 0.01$ , Pearson two-tailed correlation,  $n = 26$ ). (C) CSF tot-tau levels are significantly increased in the severe group as compared to the mild and moderate groups (\*\* $p < 0.001$ , \* $p < 0.05$ , ANOVA, LSD, mild  $n = 8$ ; moderate  $n = 4$ ;

severe  $n = 14$ ). (D) The p-tau levels in the CSF are significantly increased in the severe group as compared to the mild group (\* $p < 0.05$ , ANOVA, LSD, mild  $n = 8$ ; moderate  $n = 4$ ; severe  $n = 14$ ). Mean values are indicated in the graphs and each dot represents one individual. doi:10.1371/journal.pone.0080700.g002

A $\beta$ 42 levels in the CSF revealed no significant changes with respect to the rs7120118 genotypes (Figure 4D). However, there was a trend towards a decrease in CSF tot-tau and p-tau levels among patients with rs7120118 CC genotype as compared to CT and TT genotypes (data not shown). These findings suggest that the CC genotype of rs7120118 might decrease the progression of AD and that the CC genotype associates with reduced soluble A $\beta$ 42 levels in the inferior temporal cortex.

### The CT genotype of rs7120118 associates with increased mRNA levels of *NR1H3*

Finally, we assessed whether the disease severity affects the expression of *NR1H3*, *ABCA1*, *ABCG1* and *APOE* in the brain tissue. qPCR analysis did not reveal significant effects on the mRNA levels of these four genes with respect to disease severity (Figure 5A–D). Consequently, we addressed the question whether rs7120118 variation affects the expression of *NR1H3*, *ABCA1*, *ABCG1*, and *APOE*. qPCR analysis showed a significant increase in the mRNA levels of *NR1H3* among AD patients with the CT genotype of rs7120118 ( $p = 0.02$ ) as compared to TT genotype (Figure 6A). RNA quality (RIN values) did not significantly correlate with the altered *NR1H3* expression (Pearson's correlation,  $r = -0.20$ ,  $p = 0.08$ ). There were no significant alterations in the mRNA levels of *ABCA1*, *ABCG1* or *APOE* with respect to rs7120118 polymorphism (Figure 6B–D). In addition, a positive correlations between *NR1H3*, *ABCA1*, *ABCG1* and *APOE* mRNA levels was detected (*NR1H3* and *ABCA1*, Pearson's correlation  $r = 0.75$ ,  $p = 5.9 \times 10^{-16}$ ; *NR1H3* and *ABCG1*,  $r = 0.66$ ,  $p = 1.1 \times 10^{-9}$ ; *NR1H3* and *APOE*,  $r = 0.38$ ,  $p = 0.004$ ; *ABCA1* and *ABCG1*,  $r = 0.64$ ,  $p = 2.6 \times 10^{-9}$ ; *ABCA1* and *APOE*,  $r = 0.68$ ,  $p = 3.4 \times 10^{-9}$ ; *ABCG1* and *APOE*,  $r = 0.31$ ,  $p = 0.03$ ). Overall, these data suggest that the CT genotype of rs7120118 associates with increased mRNA levels of *NR1H3*, but the disease severity does not affect *NR1H3* expression.

### Discussion

In the present study, we have investigated the effects of rs7120118 variation on the expression of *NR1H3*, *APOE*, *ABCA1* and *ABCG1*, the levels of soluble A $\beta$ 42, and  $\beta$ -secretase activity in a sample set containing inferior temporal cortex samples of neuropathologically examined subjects with AD pathology. These samples were subdivided according to AD-related neurofibrillary pathology into mild, moderate and severe AD groups [19]. Clinical AD cases showing the Braak stage 0 were included to the mild group. The SNP rs7120118 was chosen for the analysis based on our previous study showing a protective effect for the C allele carriers of rs7120118 alongside with reduced p-tau and tot-tau levels in the CSF of AD patients [18]. Although the *NR1H3* gene region has not invoked attention in terms of genetic association in the recent genome-wide association studies [20–22], LXR $\alpha$  is currently considered a potential drug target in AD [6,12]. Thus, it is important to study whether alterations in *NR1H3* affect its own expression or the expression of its well-established downstream targets (*APOE*, *ABCA1* and *ABCG1*) known to play a role in the degradation and clearance of the A $\beta$  peptide.

Before assessing the effects of the rs7120118 variation on gene expression and AD-related pathological events, we conducted a biochemical characterization of the tissue samples extracted from

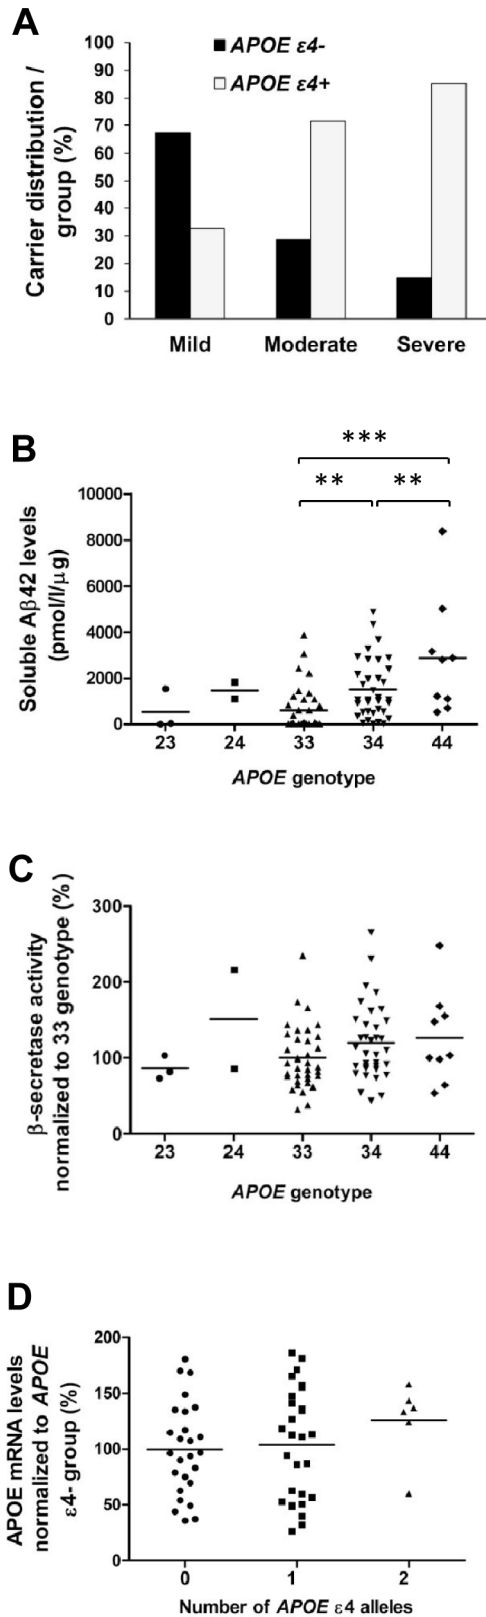

**Figure 3. *APOE*  $\epsilon 4$  allele accelerates disease progression and increases soluble A $\beta 42$  levels in the temporal cortex in a dose-dependent manner.** (A) *APOE*  $\epsilon 4$  carriers are overrepresented in the moderate and severe groups ( $p < 0.001$ , Pearson  $\chi^2$ ,  $n = (\text{APOE } \epsilon 4^-/\epsilon 4^+)$  mild 31/15; moderate 4/10; severe 4/23). (B) A $\beta 42$ -ELISA reveals a gene dose-dependent increase in the soluble A $\beta 42$  levels in the temporal

cortex of patients carrying the *APOE*  $\epsilon 4$  allele ( $***p < 0.001$ ,  $**p < 0.01$ , ANOVA LSD,  $n = 3/2/36/35/9$ , *APOE* genotypes 23/24/33/34/44, respectively). (C)  $\beta$ -secretase activity assay shows a trend towards an increased  $\beta$ -secretase activity in relation to the copy number of *APOE*  $\epsilon 4$  allele ( $n = 3/2/36/35/9$ , *APOE* genotypes 23/24/33/34/44, respectively). (D) The qPCR analysis does not indicate significant changes in *APOE* mRNA levels in the temporal cortex with respect to the number of *APOE*  $\epsilon 4$  alleles ( $n = 26/28/6$ , number of *APOE*  $\epsilon 4$  alleles 0/1/2, respectively). Mean values are indicated in the graphs and each dot represents one individual.

doi:10.1371/journal.pone.0080700.g003

the inferior temporal cortex of subjects with AD pathology. Consequently, soluble A $\beta 42$  levels were found to be gradually increased with respect to the progression of AD (mild, moderate, and severe), which in turn is in agreement with the results of previous studies showing that soluble, non-fibrillar A $\beta$  levels are elevated in AD brain samples as compared to healthy controls [23–25]. Also,  $\beta$ -secretase activity was found to be higher in both moderate and severe groups as compared to the mild group. This finding is supported by the previous reports showing an augmented  $\beta$ -secretase activity in AD brain as compared to healthy controls [26–30]. Furthermore, we found a statistically significant correlation between  $\beta$ -secretase activity and soluble A $\beta 42$  levels. These data are in line with the notion that  $\beta$ -secretase is the rate-limiting enzyme in A $\beta$  generation and that augmented  $\beta$ -secretase activity leads to increased amyloid pathology. These findings also support the idea that  $\beta$ -secretase inhibition might be a useful option in the treatment of AD patients if started early enough. Several studies have shown that the A $\beta 42$  levels in the CSF are decreased, while CSF tot-tau and p-tau levels are elevated in AD patients as compared to controls [31–34]. Here, A $\beta 42$ , tot-tau and p-tau levels in the CSF were available only from a subset of AD patients. In spite of the relatively small sample size, the CSF A $\beta 42$  levels were significantly decreased, while the tot-tau and p-tau levels showed a significant increase with respect to the progression of AD. Importantly, there was a significant negative correlation between A $\beta 42$  levels in the CSF and soluble A $\beta 42$  levels in the temporal cortex. Collectively, these findings validated the utilization of these biochemical outcome measures in the brain tissue samples in the subsequent determination of the effects of *APOE* and *NR1H3* gene variations.

*APOE*  $\epsilon 4$  allele is the major genetic risk factor for AD, which decreases the age of onset in a gene dose-dependent manner and increases A $\beta$  deposition in the brain [9]. In the present study, *APOE*  $\epsilon 4$  carriers were overrepresented in the moderate and severe groups of AD patients. Moreover, the *APOE*  $\epsilon 4$  allele increased the soluble A $\beta 42$  levels in a dose-dependent manner. This was an anticipated outcome as the previous studies have shown that *APOE*  $\epsilon 4$  allele increases A $\beta$  deposition in the cerebral cortex of AD brain [35] as well as in cognitively normal aging brain [36]. It has been shown that *APOE*  $\epsilon 4$  allele is associated with reduced levels of A $\beta 42$  in the CSF [37], which is considered to reflect increased A $\beta 42$  levels in the brain. Furthermore, a recent study showed that ApoE4 is less efficient in A $\beta$  clearance than ApoE3 in a mouse model expressing human ApoE isoforms [10]. Previous studies have assessed the ApoE protein levels in post-mortem brain samples with contrasting results, but this may partly be due to the different brain regions used in the assessments [38–43]. Only a few studies have elucidated *APOE* mRNA levels in the post-mortem brain samples [42–44]. In the present study, *APOE* mRNA levels showed an increasing trend among the AD patients homozygous for *APOE*  $\epsilon 4$  as compared to patients heterozygous for *APOE*  $\epsilon 4$  or with no  $\epsilon 4$  allele. This finding is in agreement with a previous study showing that *APOE* mRNA levels are increased in the temporal lobe of AD patients carrying the *APOE*  $\epsilon 4$  allele [45].

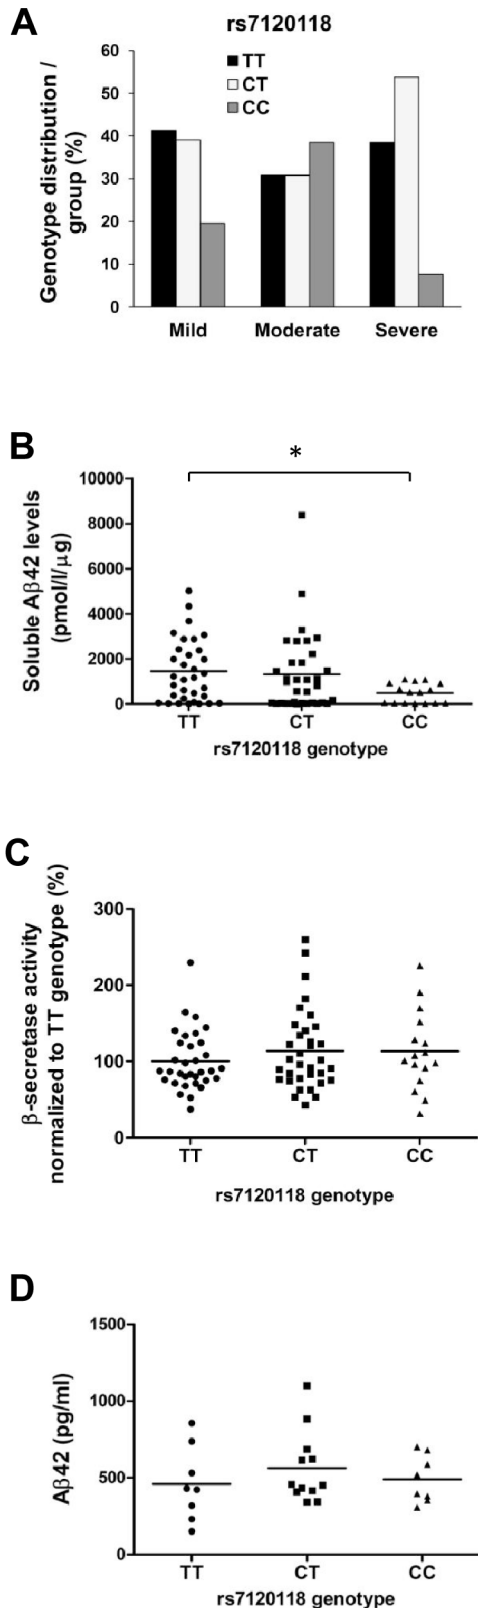

**Figure 4. CC genotype of rs7120118 variation associates with decreased soluble A $\beta$ 42 levels in the temporal cortex.** (A) The distribution of rs7120118 genotypes in subgroups divided by the severity of the disease (mild  $n=19/18/9$ ; moderate  $n=4/4/5$ ; severe  $n=10/12/2$ , rs7120118 genotypes TT/CT/CC, respectively). (B) A $\beta$ 42-ELISA demonstrates a significant decrease in the soluble A $\beta$ 42 levels in

the temporal cortex of patients with CC genotype as compared to the TT genotype ( $*p<0.05$ , ANOVA LSD,  $n=33/34/16$ , rs7120118 genotypes TT/CT/CC, respectively). (C) *NR1H3* genotype does not affect  $\beta$ -secretase activity in the temporal cortex ( $n=33/34/16$ , rs7120118 genotypes TT/CT/CC, respectively). (D) A $\beta$ 42 levels in the CSF are not significantly changed with respect to the rs7120118 genotype ( $n=8/12/8$ , rs7120118 genotypes TT/CT/CC, respectively). Mean values are indicated in the graphs.

doi:10.1371/journal.pone.0080700.g004

Taken together, our data suggest that *APOE*  $\epsilon 4$  allele increases the soluble A $\beta$ 42 levels in the brain tissue in a dose-dependent manner, but does not significantly affect the expression of *APOE*.

Previously, gender-, age-, and *APOE*-adjusted logistic regression analysis revealed a protective effect for the C allele carriers of rs7120118 among a Finnish clinic-based AD-control cohort, indicating that these patients have a decreased risk for AD [18]. Consistent with this finding, the CC genotype of rs7120118 was found to be underrepresented in the severe group in the present study. This result, however, did not reach statistical significance. Moreover, there were proportionally more subjects with the CC genotype in the moderate group as compared to the mild group, arguing against an additive effect for the C allele in this sample set. Nevertheless, the protective effect of the C allele of rs7120118 was supported by the biochemical measurements showing significantly decreased soluble A $\beta$ 42 levels in the brain of AD patients with rs7120118 CC genotype as compared to the TT genotype.  $\beta$ -secretase activity was not affected by the rs7120118 variation, suggesting that the decrease in the soluble levels of A $\beta$ 42 may be linked to increased clearance and/or degradation rather than decreased production of A $\beta$ . This is a plausible assumption considering that the LXR $\alpha$  agonists increase the clearance of A $\beta$  [6]. The A $\beta$ 42 levels in the CSF did not show significant alteration with respect to the rs7120118 genotypes, but this could be due to the small number of CSF samples available for the present analysis. Since the mRNA levels of *NR1H3*, *ABCA1*, *ABCG1*, and *APOE* did not change with respect to the severity of AD, we were able to address the question whether the rs7120118 variation affects the mRNA levels of these genes. Consequently, the mRNA levels of *NR1H3* were found to be significantly increased among the AD patients with the rs7120118 CT genotype as compared to the TT genotype. However, since the mRNA levels of *NR1H3* in the subjects with CC genotype were in a similar level as in the subjects with TT genotype, it is questionable whether the expressional increase of *NR1H3* observed in the CT genotype group is biologically relevant. In line with this, increased mRNA levels of *NR1H3* in the rs7120118 CT genotype group did not affect the expression of well-established *NR1H3* downstream targets, *ABCA1*, *ABCG1* or *APOE* when analyzed with respect to rs7120118 variation. However, a significant positive correlation between the mRNA levels of *NR1H3*, *ABCA1*, *ABCG1*, and *APOE* was observed, indicating that at an individual level, changes in the expression of *NR1H3* are subsequently reflected on the expression of its downstream targets. Finally, it is unclear how the observed *NR1H3* results from post-mortem samples reflect the situation in the living human brain. For example, it is possible that post-mortem-related degradation processes have affected the observed results. Although there was variation with respect to RNA quality, long post-mortem delays did not correlate with reduced RNA quality (RIN values). Also, variation in the RNA quality did not correlate with altered *NR1H3* expression.

LXR $\alpha$  is involved in the control of lipid homeostasis and inflammation, while the activation of LXR $\alpha$ -related downstream targets has beneficial effects in pathologic conditions, such as atherosclerosis [46], inflammation [47], and AD [48]. However,



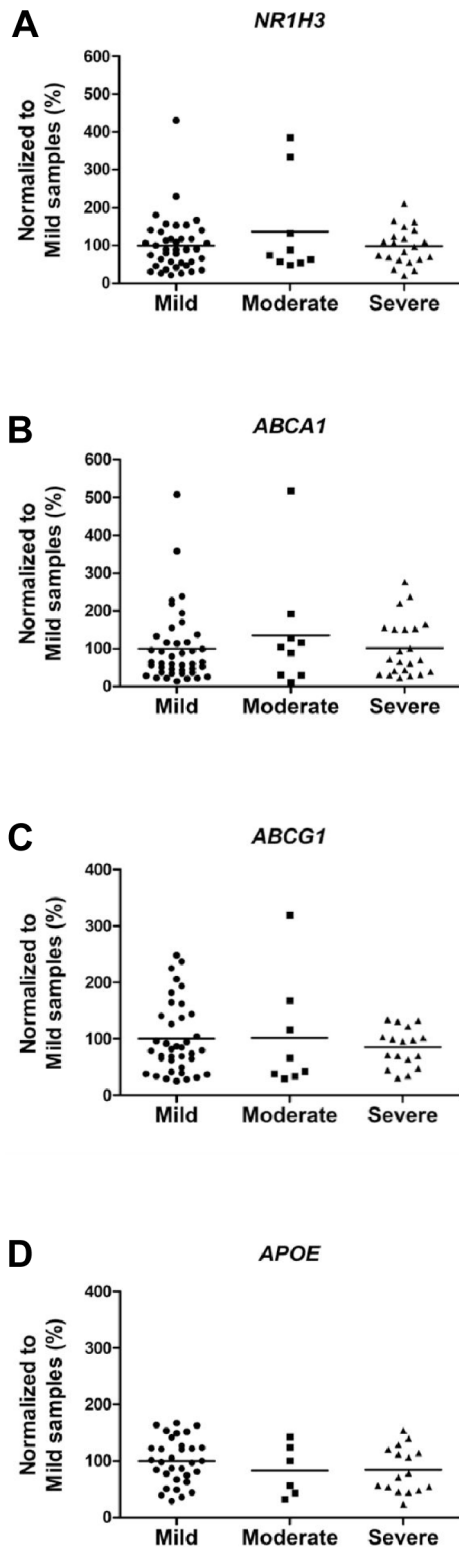

**Figure 5. Severity of AD does not affect the mRNA levels of *NR1H3*, *ABCA1*, *ABCG1* or *APOE*.** qPCR analysis of the mRNA levels of (A) *NR1H3*, (B) *ABCA1*, (C) *ABCG1* and (D) *APOE* mRNA levels does not reveal significant changes with respect to the severity of AD (*NR1H3* n = 40/9/21; *ABCA1* n = 42/9/22; *ABCG1* n = 38/8/17; *APOE* n = 32/6/16, mild/moderate/severe, respectively). Mean values are indicated in the graphs.  
doi:10.1371/journal.pone.0080700.g005

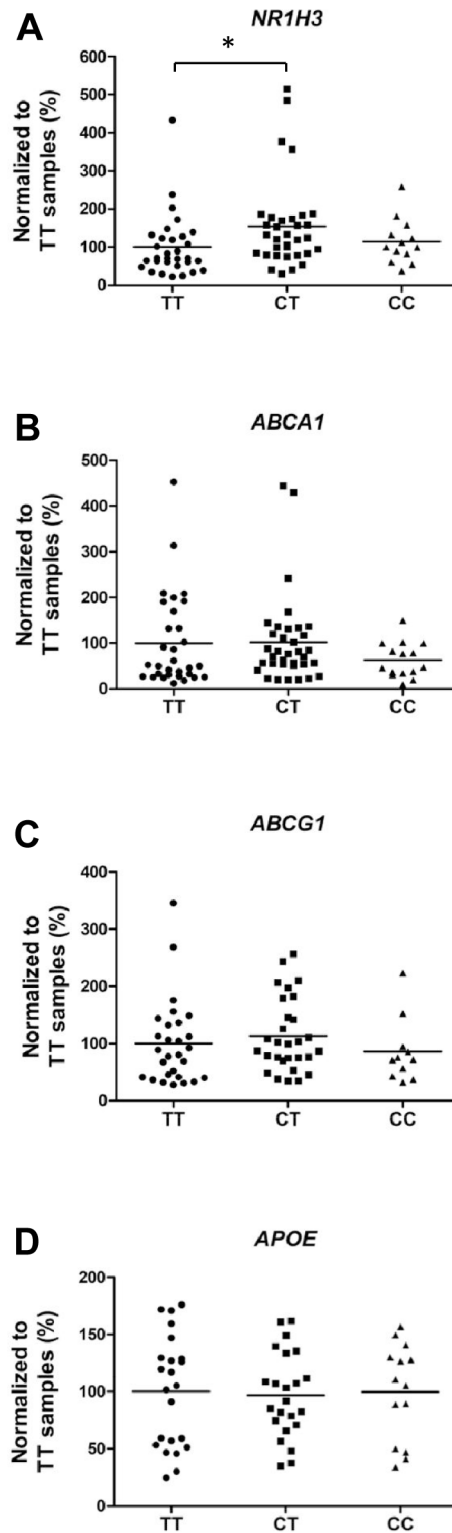

**Figure 6. CT genotype of the rs7120118 variation increases the mRNA levels of *NR1H3* as compared to TT genotype.** (A) qPCR analysis indicates ~50% increase in the mRNA levels of *NR1H3* in the temporal cortex of AD patients with rs7120118 CT genotype as compared to TT genotype (\*p < 0.05, ANOVA LSD, n = 31/33/13, rs7120118 genotypes TT/CT/CC, respectively). (B–D) The mRNA levels of *ABCA1*, *ABCG1* and *APOE* do not change with respect to the rs7120118 genotype (*ABCA1* n = 31/35/15; *ABCG1* n = 28/29/11; *APOE* n = 23/23/14, rs7120118 genotypes TT/CT/CC, respectively). Mean values are indicated in the graphs.  
doi:10.1371/journal.pone.0080700.g006



long-term activation of LXR $\alpha$  may lead to adverse side effects, including hepatic steatosis [49]. Thus, it is rational that there exist mechanisms, which can efficiently regulate the activation and/or expression of LXR $\alpha$ . A complex regulation system that was recently presented suggests that LXR $\alpha$  autoregulates its own expression via the induction of SREBP-1c, which in turn up-regulates miRNA hsa-miR-613 [50]. This miRNA has a binding site at the 3'UTR of *NR1H3* and thus is able to repress the expression of LXR $\alpha$ . Since rs7120118 resides at a large haplotype block at the 3'UTR of the *NR1H3* gene, in which the SNPs are in strong linkage disequilibrium ( $D' = 0.92-1.0$ ,  $r^2 = 0.03-0.96$ ), it is possible that genetic variation within or in the vicinity of miRNA binding site(s) could alter miRNA binding and thus affect the expression of LXR $\alpha$ . In fact, SNP rs375078947 locates immediately next to the 5' end of the binding site of miRNA hsa-miR-613 and thus it is possible that this polymorphism could affect the binding affinity of this miRNA to *NR1H3*. Apart from the already validated binding of miRNA hsa-miR-613 to the *NR1H3* [50], a search on a database predicting the miRNA targets (miRWalk) revealed 25 putative miRNA binding sites in the 3'UTR of *NR1H3*, suggesting that miRNA-mediated regulation of LXR $\alpha$  expression could extend beyond hsa-miR-613.

## References

- Blennow K, de Leon MJ, Zetterberg H (2006) Alzheimer's disease. *Lancet* 368: 387–403.
- De Strooper B, Annaert W (2000) Proteolytic processing and cell biological functions of the amyloid precursor protein. *J Cell Sci* 113 (Pt 11): 1857–1870.
- Mawuenyega KG, Sigurdson W, Ovod V, Munsell L, Kasten T, et al. (2010) Decreased clearance of CNS  $\beta$ -amyloid in Alzheimer's disease. *Science* 330: 1774.
- Potter R, Patterson BW, Elbert DL, Ovod V, Kasten T, et al. (2013) Increased in vivo amyloid-beta42 production, exchange, and loss in presenilin mutation carriers. *Sci Transl Med* 5: 189ra77.
- Tanzi RE, Moir RD, Wagner SL (2004) Clearance of Alzheimer's A $\beta$  peptide: The many roads to perdition. *Neuron* 43: 605–608.
- Jiang Q, Lee CYD, Mandrekas S, Wilkinson B, Cramer P, et al. (2008) ApoE promotes the proteolytic degradation of A $\beta$ . *Neuron* 58: 681–693.
- Xu Q, Bernardo A, Walker D, Kanegawa T, Mahley RW, et al. (2006) Profile and regulation of apolipoprotein E (ApoE) expression in the CNS in mice with targeting of green fluorescent protein gene to the ApoE locus. *J Neurosci* 26: 4985–4994.
- Mahley RW, Rall Jr SC (2000) Apolipoprotein E: Far more than a lipid transport protein. *Annu Rev Genomics Hum Genet* 1: 507–537.
- Liu CC, Kanekiyo T, Xu H, Bu G (2013) Apolipoprotein e and Alzheimer disease: Risk, mechanisms and therapy. *Nat Rev Neurol* 9: 106–118.
- Castellano JM, Kim J, Stewart FR, Jiang H, DeMattos RB, et al. (2011) Human apoE isoforms differentially regulate brain amyloid- $\beta$  peptide clearance. *Sci Transl Med* 3: 89ra57.
- Beaven SW, Tontonoz P (2006) Nuclear receptors in lipid metabolism: Targeting the heart of dyslipidemia. *Annu Rev Med* 57: 313–329.
- Cramer PE, Cirrito JR, Wesson DW, Lee CYD, Karlo JC, et al. (2012) ApoE-directed therapeutics rapidly clear  $\beta$ -amyloid and reverse deficits in AD mouse models. *Science* 335: 1503–1506.
- Donkin JJ, Stukas S, Hirsch-Reinshagen V, Namjoshi D, Wilkinson A, et al. (2010) ATP-binding cassette transporter A1 mediates the beneficial effects of the liver X receptor agonist GW3965 on object recognition memory and amyloid burden in amyloid precursor protein/presenilin 1 mice. *J Biol Chem* 285: 34144–34154.
- Fitz NF, Cronican AA, Lefterov I, Koldamova R (2013) Comment on "ApoE-directed therapeutics rapidly clear  $\beta$ -amyloid and reverse deficits in AD mouse models". *Science* 340: 924-c.
- Price AR, Xu G, Sieminski ZB, Smithson LA, Borchelt DR, et al. (2013) Comment on "ApoE-directed therapeutics rapidly clear beta-amyloid and reverse deficits in AD mouse models". *Science* 340: 924-d.
- Tessier I, Lo AC, Roberfroid A, Dietvorst S, Van Broeck B, et al. (2013) Comment on "ApoE-directed therapeutics rapidly clear beta-amyloid and reverse deficits in AD mouse models". *Science* 340: 924-e.
- Veeraraghavalu K, Zhang C, Miller S, Hefendehl JK, Rajapaksha TW, et al. (2013) Comment on "ApoE-directed therapeutics rapidly clear beta-amyloid and reverse deficits in AD mouse models". *Science* 340: 924-f.
- Natunen T, Helisalmi S, Vepsäläinen S, Sarajarvi T, Antikainen L, et al. (2012) Genetic analysis of genes involved in amyloid- $\beta$  degradation and clearance in Alzheimer's disease. *J Alzheimer's Dis* 28: 553–559.
- Braak H, Alafuzoff I, Arzberger T, Kretschmar H, Tredici K (2006) Staging of Alzheimer disease-associated neurofibrillary pathology using paraffin sections and immunocytochemistry. *Acta Neuropathol* 112: 389–404.
- Harold D, Abraham R, Hollingworth P, Sims R, Gerrish A, et al. (2009) Genome-wide association study identifies variants at *CLU* and *PICALM* associated with Alzheimer's disease. *Nat Genet* 41: 1088–1093.
- Hollingworth P, Harold D, Sims R, Gerrish A, Lambert JC, et al. (2011) Common variants at *ABCA7*, *MS4A6A/MS4A4E*, *EPHA1*, *CD33* and *CD2AP* are associated with Alzheimer's disease. *Nat Genet* 43: 429–436.
- Lambert JC, Heath S, Even G, Campion D, Sleegers K, et al. (2009) Genome-wide association study identifies variants at *CLU* and *CR1* associated with Alzheimer's disease. *Nat Genet* 41: 1094–1099.
- Lue LF, Kuo YM, Roher AE, Brachova L, Shen Y, et al. (1999) Soluble amyloid  $\beta$  peptide concentration as a predictor of synaptic change in Alzheimer's disease. *Am J Pathol* 155: 853–862.
- McLean CA, Cherny RA, Fraser FW, Fuller SJ, Smith MJ, et al. (1999) Soluble pool of A $\beta$  amyloid as a determinant of severity of neurodegeneration in Alzheimer's disease. *Ann Neurol* 46: 860–866.
- Wang J, Dickson DW, Trojanowski JQ, Lee VMY (1999) The levels of soluble versus insoluble brain A $\beta$  distinguish Alzheimer's disease from normal and pathologic aging. *Exp Neurol* 158: 328–337.
- Fukumoto H, Cheung BS, Hyman BT, Irizarry MC (2002)  $\beta$ -Secretase protein and activity are increased in the neocortex in Alzheimer disease. *Arch Neurol* 59: 1381–1389.
- Holsinger RMD, McLean CA, Beyreuther K, Masters CL, Evin G (2002) Increased expression of the amyloid precursor  $\beta$ -secretase in Alzheimer's disease. *Ann Neurol* 51: 783–786.
- Li R, Lindholm K, Yang LB, Yue X, Citron M, et al. (2004) Amyloid  $\beta$  peptide load is correlated with increased  $\beta$ -secretase activity in sporadic Alzheimer's disease patients. *Proc Natl Acad Sci U S A* 101: 3632–3637.
- Tyler SJ, Dawbarn D, Wilcock GK, Allen SJ (2002)  $\alpha$ - And  $\beta$ -secretase: Profound changes in Alzheimer's disease. *Biochem Biophys Res Commun* 299: 373–376.
- Yang LB, Lindholm K, Yan R, Citron M, Xia W, et al. (2003) Elevated  $\beta$ -secretase expression and enzymatic activity detected in sporadic Alzheimer disease [1]. *Nat Med* 9: 3–4.
- Galasko D, Chang L, Motter R, Clark CM, Kaye J, et al. (1998) High cerebrospinal fluid tau and low amyloid  $\beta$ 42 levels in the clinical diagnosis of Alzheimer disease and relation to apolipoprotein E genotype. *Arch Neurol* 55: 937–945.
- Herukka SK, Helisalmi S, Hallikainen M, Tervo S, Soininen H, et al. (2007) CSF A $\beta$ 42, tau and phosphorylated tau, APOE  $\epsilon$ 4 allele and MCI type in progressive MCI. *Neurobiol Aging* 28: 507–514.
- Tapiola T, Alafuzoff I, Herukka SK, Parkkinen L, Hartikainen P, et al. (2009) Cerebrospinal fluid  $\beta$ -amyloid 42 and tau proteins as biomarkers of Alzheimer-type pathologic changes in the brain. *Arch Neurol* 66: 382–389.
- Blennow K, Hampel H, Weiner M, Zetterberg H (2010) Cerebrospinal fluid and plasma biomarkers in Alzheimer disease. *Nat Rev Neurol* 6: 131–144.
- Schmechel DE, Saunders AM, Strittmatter WJ, Crain BJ, Hulette CM, et al. (1993) Increased amyloid  $\beta$ -peptide deposition in cerebral cortex as a consequence of apolipoprotein E genotype in late-onset Alzheimer disease. *Proc Natl Acad Sci U S A* 90: 9649–9653.

Taken together, the results of the present study suggest that rs7120118 polymorphism in *NR1H3* affects LXR $\alpha$  expression and the soluble levels of A $\beta$ 42 in the temporal cortex of AD patients. Particularly, the CC genotype of the rs7120118 variation, which associated with decreased AD risk in our previous study, is linked to decreased soluble A $\beta$ 42 levels in AD brain. Although further studies are needed to unravel the underlying molecular mechanisms related to these findings, it is possible that they reflect changes in A $\beta$  clearance mechanisms that, depending on the genetic variation, may either enhance or decelerate the disease pathogenesis. Thus, it is possible that AD patients with different *APOE* and *NR1H3* genotypes respond differently to LXR $\alpha$  agonist or other ApoE-related treatments. These notions emphasize the importance of determining the genetic profiles of these potential drug targets when designing treatment options for individual AD patients.

## Author Contributions

Conceived and designed the experiments: TN JPP AH IA HS MH. Performed the experiments: TN TS JPP ML IA PM SH. Analyzed the data: TN MH. Contributed reagents/materials/analysis tools: TN HM TS SP JV TK IA TR VL SH. Wrote the paper: TN AH HS MH.

36. Morris JC, Roe CM, Xiong C, Fagan AM, Goate AM, et al. (2010) APOE predicts amyloid-beta but not tau Alzheimer pathology in cognitively normal aging. *Ann Neurol* 67: 122–131.
37. Prince JA, Zetterberg H, Andreassen N, Marcusson J, Blennow K (2004) APOE  $\epsilon$ 4 allele is associated with reduced cerebrospinal fluid levels of A $\beta$ 42. *Neurology* 62: 2116–2118.
38. Bertrand P, Poirier J, Oda T, Finch CE, Pasinetti GM (1995) Association of apolipoprotein E genotype with brain levels of apolipoprotein E and apolipoprotein J (clusterin) in Alzheimer disease. *Mol Brain Res* 33: 174–178.
39. Beffert U, Cohn JS, Petit-Turcotte C, Tremblay M, Aumont N, et al. (1999) Apolipoprotein E and  $\beta$ -amyloid levels in the hippocampus and frontal cortex of Alzheimer's disease subjects are disease-related and apolipoprotein E genotype dependent. *Brain Res* 843: 87–94.
40. Glöckner F, Meske V, Ohm TG (2002) Genotype-related differences of hippocampal apolipoprotein E levels only in early stages of neuropathological changes in Alzheimer's disease. *Neuroscience* 114: 1103–1114.
41. Ramassamy C, Averill D, Beffert U, Theroux L, Lussier-Cacan S, et al. (2000) Oxidative insults are associated with apolipoprotein E genotype in Alzheimer's disease brain. *Neurobiol Dis* 7: 23–37.
42. Matsui T, Ingelsson M, Fukumoto H, Ramasamy K, Kowa H, et al. (2007) Expression of APP pathway mRNAs and proteins in alzheimer's disease. *Brain Res* 1161: 116–123.
43. Bekris LM, Galloway NM, Montine TJ, Schellenberg GD, Yu CE (2010) APOE mRNA and protein expression in postmortem brain are modulated by an extended haplotype structure. *Am J Med Genet B Neuropsychiatr Genet* 153B: 409–417.
44. Yamada T, Kondo A, Takamatsu JI, Tateishi J, Goto I (1995) Apolipoprotein E mRNA in the brains of patients with Alzheimer's disease. *J Neurol Sci* 129: 56–61.
45. Yamagata K, Urakami K, Ikeda K, Ji Y, Adachi Y, et al. (2001) High expression of apolipoprotein E mRNA in the brains with sporadic Alzheimer's disease. *Dement Geriatr Cogn Disord* 12: 57–62.
46. Tontonoz P, Mangelsdorf DJ (2003) Liver X receptor signaling pathways in cardiovascular disease. *Mol Endocrinol* 17: 985–993.
47. Zelcer N, Tontonoz P (2006) Liver X receptors as integrators of metabolic and inflammatory signaling. *J Clin Invest* 116: 607–614.
48. Cao G, Bales KR, DeMattos RB, Paul SM (2007) Liver X receptor-mediated gene regulation and cholesterol homeostasis in brain: Relevance to Alzheimer's disease therapeutics. *Curr Alzheimer Res* 4: 179–184.
49. Mandrekar-Colucci S, Landreth GE (2011) Nuclear receptors as therapeutic targets for Alzheimer's disease. *Expert Opin Ther Targets* 15: 1085–1097.
50. Ou Z, Wada T, Gramignoli R, Li S, Strom SC, et al. (2011) MicroRNA hsa-miR-613 targets the human LXR $\alpha$  gene and mediates a feedback loop of LXR $\alpha$  autoregulation. *Mol Endocrinol* 25: 584–596.
